# Supplementary material
Source: HighWire-hosted journal article supplement (https://bmjopen.bmj.com/content/8/1/e018042)
Supplement: inline-supplementary-material-1 [file inline-supplementary-material-1.pdf]

**Appendix Table: Primary diagnoses coded in the 372 encounters according to International Statistical Classification of Diseases and Related Health Problems Revision 10 (ICD-10)**

| <b>ICD-10 categories (classification letter)</b>                     | <b>N (%)</b>     |
|----------------------------------------------------------------------|------------------|
| Diseases of the circulatory system (I)                               | 50 (13)          |
| Neoplasms (C/D)                                                      | 38 (10)          |
| Symptoms, signs, findings not classified elsewhere (R)               | 35 (9)           |
| Diseases of the digestive system (K)                                 | 32 (9)           |
| Diseases of the musculoskeletal system (M)                           | 29 (8)           |
| Diseases of the genitourinary system (N)                             | 28 (8)           |
| Endocrine disorders (E)                                              | 27 (7)           |
| Diseases of the nervous system (G)                                   | 25 (7)           |
| Diseases of the respiratory system (J)                               | 25 (7)           |
| Pregnancy, childbirth (O)                                            | 18 (5)           |
| Injury due to external cause (S/T)                                   | 16 (4)           |
| Infectious disease (A/B)                                             | 14 (4)           |
| Congenital malformations (Q)                                         | 8 (2)            |
| Factors influencing health status and contact with health system (Z) | 6 (1)            |
| Diseases of the ear (H)                                              | 5 (1)            |
| Diseases of the skin (L)                                             | 4 (1)            |
| Diseases of the blood (D)                                            | 3 (1)            |
| Mental and behavioral disorders (F)                                  | 3 (1)            |
| Conditions originating in perinatal period (P)                       | 3 (1)            |
| Preoperative visit without known problem                             | 3 (1)            |
| <b>Total</b>                                                         | <b>372 (100)</b> |
